# Supplementary material for: Integrated genomic and transcriptomic analysis reveals unique characteristics of hepatic metastases and pro-metastatic role of complement C1q in pancreatic ductal adenocarcinoma
Source: PubMed Central journal article supplement (PMC7780398; doi:10.1186/s13059-020-02222-w), 2021-01-04
Supplement: 13059_2020_2222_MOESM1_ESM.pdf [file 13059_2020_2222_MOESM1_ESM.pdf]

# Additional File 1 for

Integrated genomic and transcriptomic analysis reveals unique characteristics of hepatic metastases and pro-metastatic role of complement C1q in pancreatic ductal adenocarcinoma

Jianyu Yang<sup>1\*</sup>, Ping Lin<sup>2\*</sup>, Minwei Yang<sup>1\*</sup>, Wei Liu<sup>1</sup>, XueLiang Fu<sup>1</sup>, DeJun Liu<sup>1</sup>, LingYe Tao<sup>1</sup>, YanMiao Huo<sup>1</sup>, JunFeng Zhang<sup>1</sup>, Rong Hua<sup>1</sup>, ZhiGang Zhang<sup>3#</sup>, YiXue Li<sup>2,4,5,6#</sup>, Liwei Wang<sup>3,7#</sup>, Jing Xue<sup>8#</sup>, Hong Li<sup>2#</sup>, Yongwei Sun<sup>1#</sup>

1. Department of Biliary-Pancreatic Surgery, Ren Ji Hospital, School of Medicine, Shanghai Jiao Tong University, Shanghai 200127, China.
2. CAS-MPG Partner Institute for Computational Biology, Shanghai Institute of Nutrition and Health, Shanghai Institutes for Biological Sciences, University of Chinese Academy of Sciences, Chinese Academy of Sciences, Shanghai 200031, PR China.
3. State Key Laboratory of Oncogenes and Related Genes, Shanghai Cancer Institute, Ren Ji Hospital, School of Medicine, Shanghai Jiao Tong University, Shanghai 200240, China.
4. School of Life Sciences and Biotechnology, Shanghai Jiao Tong University, Shanghai 200240, China.
5. Collaborative Innovation Center for Genetics and Development, Fudan University, Shanghai, 200032, China.
6. Shanghai Center for Bioinformation Technology, Shanghai Academy of Science & Technology, Shanghai, 201203, China.
7. Department of Oncology, Ren Ji Hospital, School of Medicine, Shanghai Jiao Tong University, Shanghai 200127, China.
8. State Key Laboratory of Oncogenes and Related Genes, Renji-Med X Clinical Stem Cell Research Center, Shanghai Cancer Institute, Shanghai Jiao Tong University School of Medicine Affiliated Renji Hospital, Shanghai 200240, China.

**#Correspondence to:** Yongwei Sun (E-mail: syw0616@126.com); Hong Li ( E-mail: lihong01@sibs.ac.cn); Yixue Li (E-mail: yxli@sibs.ac.cn); Jing Xue (E-mail: xuejing0904@126.com); Liwei Wang (E-mail: liweiwang@shsmu.edu.cn) and Zhigang Zhang (E-mail: zzhang@shsci.org)

**\* Authors contributed equally to this work**

## **Contents:**

Table S1

Fig. S1-S6

Supplementary Table Notes

Supplementary Figure Legends

Reference

Table S1. clinicopathological characteristics of all enrolled metastatic patients

| Patient  | Tumor location | Sex | Age (years) | Treatment before surgery | Primary tumor histologic type of | Survival (month) | WES  |       |       | RNA-seq |       |       | Validation |
|----------|----------------|-----|-------------|--------------------------|----------------------------------|------------------|------|-------|-------|---------|-------|-------|------------|
|          |                |     |             |                          |                                  |                  | N    | T     | HM    | N       | T     | HM    | N-T-HM     |
| RJPDAC01 | Body/Tail      | M   | 57          | NO                       | PDAC                             | 56               | X    | X     | X     | √       | √     | √     | √          |
| RJPDAC02 | Body/Tail      | F   | 59          | NO                       | PDAC                             | -                | √    | √     | √     | X       | X     | √     | √          |
| RJPDAC03 | Body/Tail      | M   | 59          | NO                       | PDAC                             | 13.5             | X    | X     | X     | X       | √     | √     | √          |
| RJPDAC04 | Body/Tail      | F   | 62          | NO                       | PDAC                             | 20.8             | √    | √     | √     | X       | √     | √     | √          |
| RJPDAC07 | Head           | F   | 48          | NO                       | PDAC                             | 4.1              | X    | X     | X     | X       | √     | √     | X          |
| RJPDAC08 | Body/Tail      | M   | 68          | NO                       | PDAC                             | 7.3              | √    | √     | √     | √       | √     | √     | √          |
| RJPDAC09 | Body/Tail      | F   | 59          | NO                       | PDAC                             | 6.2              | √    | √     | √     | X       | √     | √     | √          |
| RJPDAC10 | Body/Tail      | F   | 67          | NO                       | PDAC                             | 16.5             | √    | √     | √     | √       | √     | √     | √          |
| RJPDAC11 | Body/Tail      | M   | 59          | NO                       | PDAC                             | 6.2              | √    | √     | √     | X       | X     | X     | √          |
| RJPDAC12 | Head           | M   | 75          | NO                       | PDAC                             | 17.1             | X    | X     | X     | √       | √     | √     | X          |
| RJPDAC13 | Body/Tail      | F   | 53          | NO                       | PDAC                             | 17.5             | √    | √     | √     | √       | √     | √     | √          |
| RJPDAC14 | Body/Tail      | M   | 57          | NO                       | PDAC                             | 16.1             | √    | √     | √     | X       | √     | √     | √          |
| RJPDAC15 | Body/Tail      | M   | 63          | NO                       | PDAC                             | 7.8              | √    | √     | √     | √       | √     | √     | √          |
| RJPDAC17 | Head           | F   | 64          | NO                       | PDAC                             | 6.0              | X    | X     | X     | X       | √     | √     | √          |
| RJPDAC18 | Head           | M   | 66          | NO                       | PDAC                             | 6.0              | X    | X     | X     | X       | √     | √     | X          |
| RJPDAC19 | Head           | M   | 68          | NO                       | PDAC                             | 2.2              | X    | √     | √     | X       | X     | X     | X          |
| RJPDAC21 | Body/Tail      | F   | 66          | NO                       | PDAC                             | 3.9              | X    | √     | √     | X       | X     | X     | X          |
| RJPDAC22 | Head           | F   | 60          | NO                       | PDAC                             | 31.0             | X    | X     | X     | X       | X     | X     | √          |
| RJPDAC23 | Head           | M   | 55          | NO                       | PDAC                             | 4.3              | X    | X     | X     | X       | X     | X     | √          |
| RJPDAC24 | Head           | M   | 71          | NO                       | PDAC                             | 17.0             | X    | X     | X     | X       | X     | X     | √          |
| RJPDAC25 | Head           | F   | 82          | NO                       | PDAC                             | 5.2              | X    | X     | X     | X       | X     | X     | √          |
| RJPDAC26 | Head           | M   | 40          | NO                       | PDAC                             | 3.6              | X    | X     | X     | X       | X     | X     | √          |
| RJPDAC27 | Head           | F   | 50          | NO                       | PDAC                             | 19.0             | X    | X     | X     | X       | X     | X     | √          |
| RJPDAC28 | Head           | F   | 68          | NO                       | PDAC                             | 4.1              | X    | X     | X     | X       | X     | X     | √          |
| RJPDAC29 | Head           | M   | 58          | NO                       | PDAC                             | 5.7              | X    | X     | X     | X       | X     | X     | √          |
| RJPDAC30 | Head           | M   | 58          | NO                       | PDAC                             | 8.9              | X    | X     | X     | X       | X     | X     | √          |
| RJPDAC31 | Body/Tail      | M   | 63          | NO                       | PDAC                             | 14.5             | X    | X     | X     | X       | X     | X     | √          |
| RJPDAC32 | Body/Tail      | M   | 65          | NO                       | PDAC                             | 7.7              | X    | X     | X     | X       | X     | X     | √          |
| RJPDAC33 | Body/Tail      | M   | 69          | NO                       | PDAC                             | 15.0             | X    | X     | X     | X       | X     | X     | √          |
| RJPDAC34 | Body/Tail      | F   | 69          | NO                       | PDAC                             | 16.9             | X    | X     | X     | X       | X     | X     | √          |
| RJPDAC35 | Body/Tail      | M   | 75          | NO                       | PDAC                             | 21.0             | X    | X     | X     | X       | X     | X     | √          |
| RJPDAC36 | Body/Tail      | M   | 47          | NO                       | PDAC                             | 21.0             | X    | X     | X     | X       | X     | X     | √          |
| RJPDAC37 | Body/Tail      | M   | 69          | NO                       | PDAC                             | 22.0             | X    | X     | X     | X       | X     | X     | √          |
| RJPDAC38 | Head           | F   | 69          | NO                       | PDAC                             | 1.0              | X    | X     | X     | X       | X     | X     | √          |
| RJPDAC39 | Head           | M   | 64          | NO                       | PDAC                             | 7.8              | X    | X     | X     | X       | X     | X     | √          |
| RJPDAC40 | Body/Tail      | M   | 58          | NO                       | PDAC                             | 2.8              | X    | X     | X     | X       | X     | X     | √          |
| RJPDAC41 | Body/Tail      | F   | 58          | NO                       | PDAC                             | 3.2              | X    | X     | X     | X       | X     | X     | √          |
| RJPDAC42 | Body/Tail      | M   | 53          | NO                       | PDAC                             | 8.2              | X    | X     | X     | X       | X     | X     | √          |
| RJPDAC43 | Body/Tail      | M   | 61          | NO                       | PDAC                             | 9.7              | X    | X     | X     | X       | X     | X     | √          |
| RJPDAC44 | Body/Tail      | M   | 77          | NO                       | PDAC                             | 17.0             | X    | X     | X     | X       | X     | X     | √          |
| Total    |                |     |             |                          |                                  |                  | 9.00 | 11.00 | 11.00 | 6.00    | 13.00 | 14.00 | 35.00      |

Fig S1

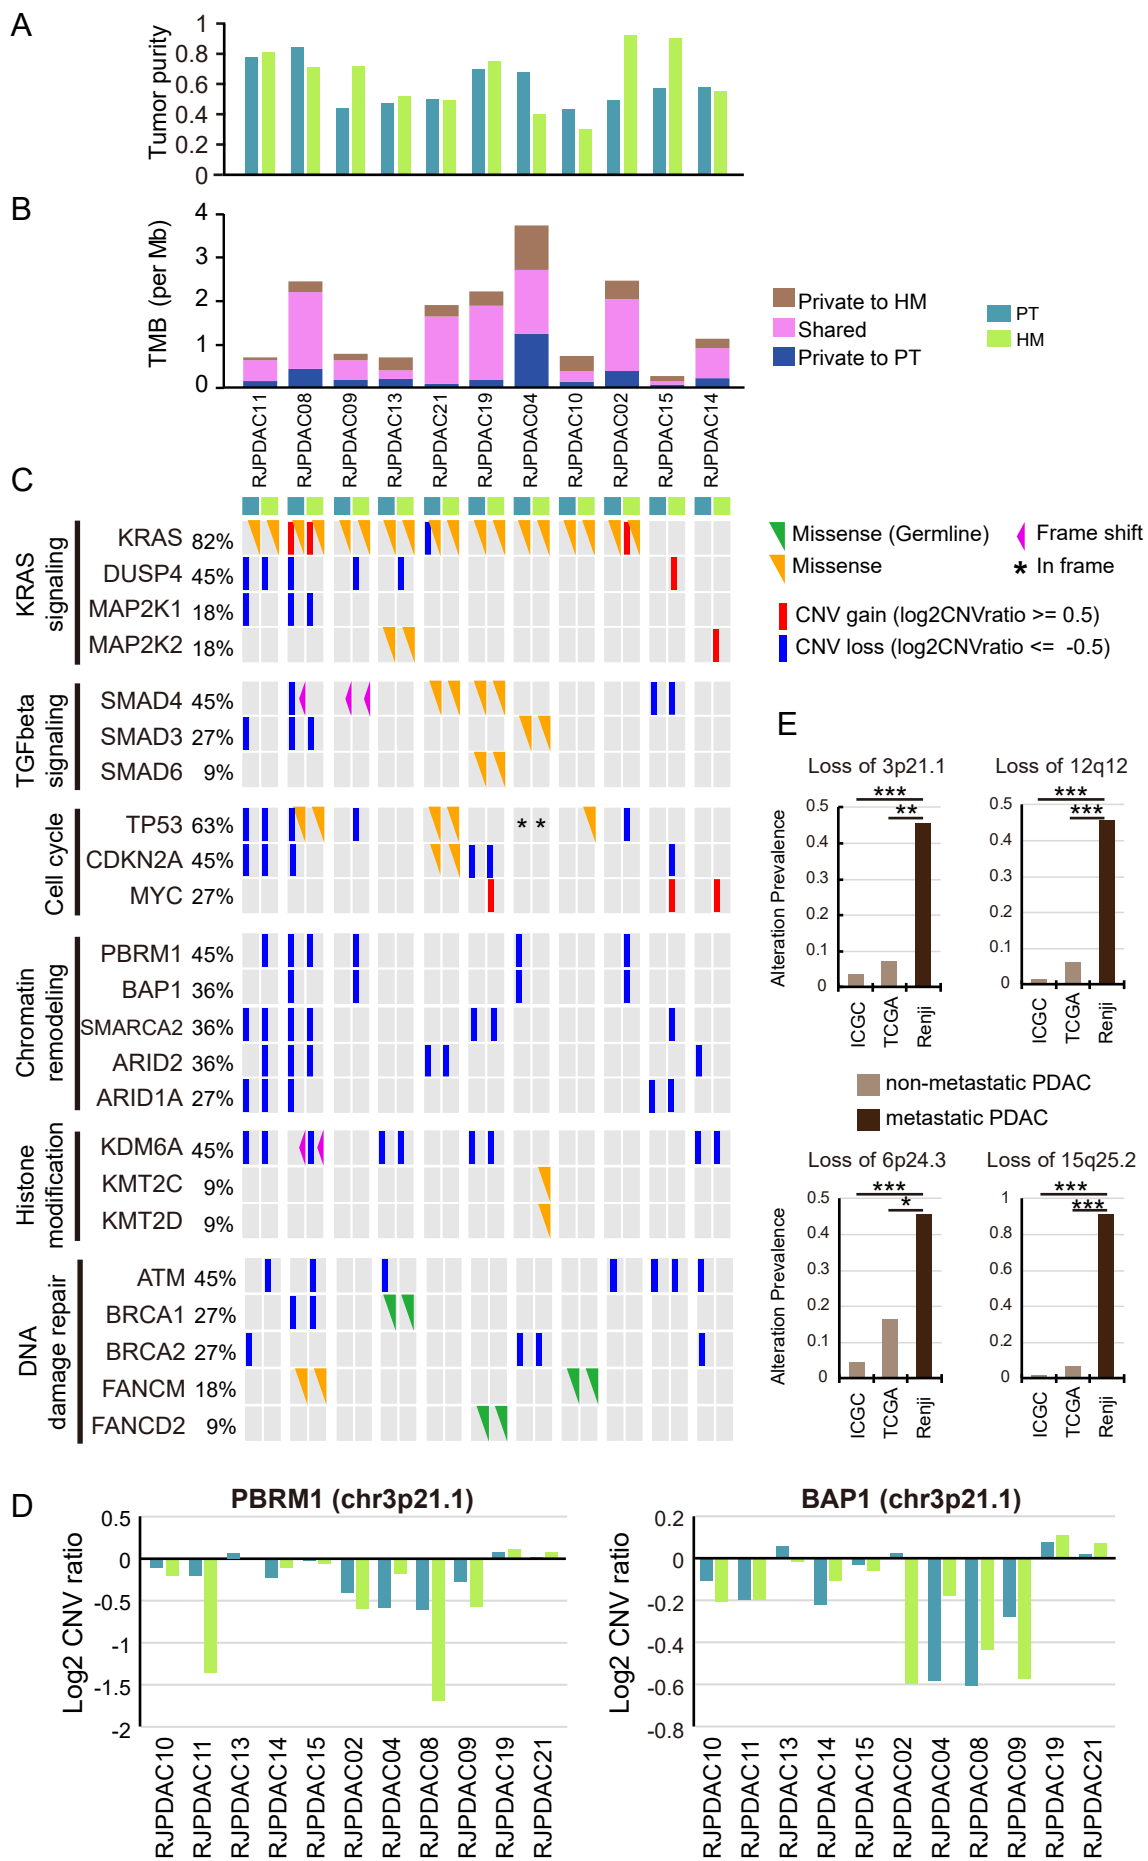

Fig S2

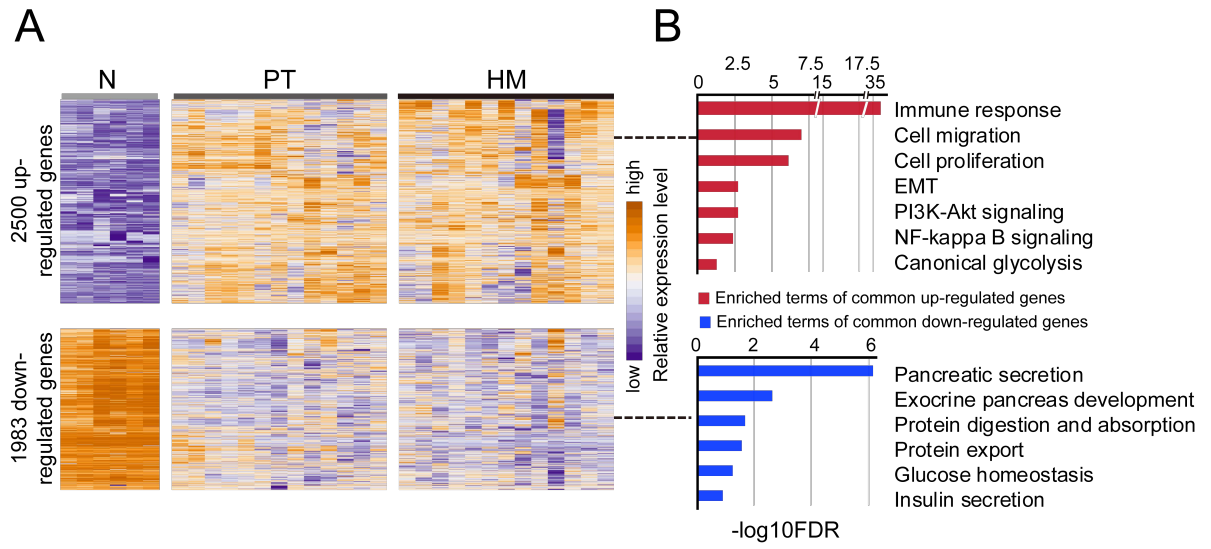

Fig S3

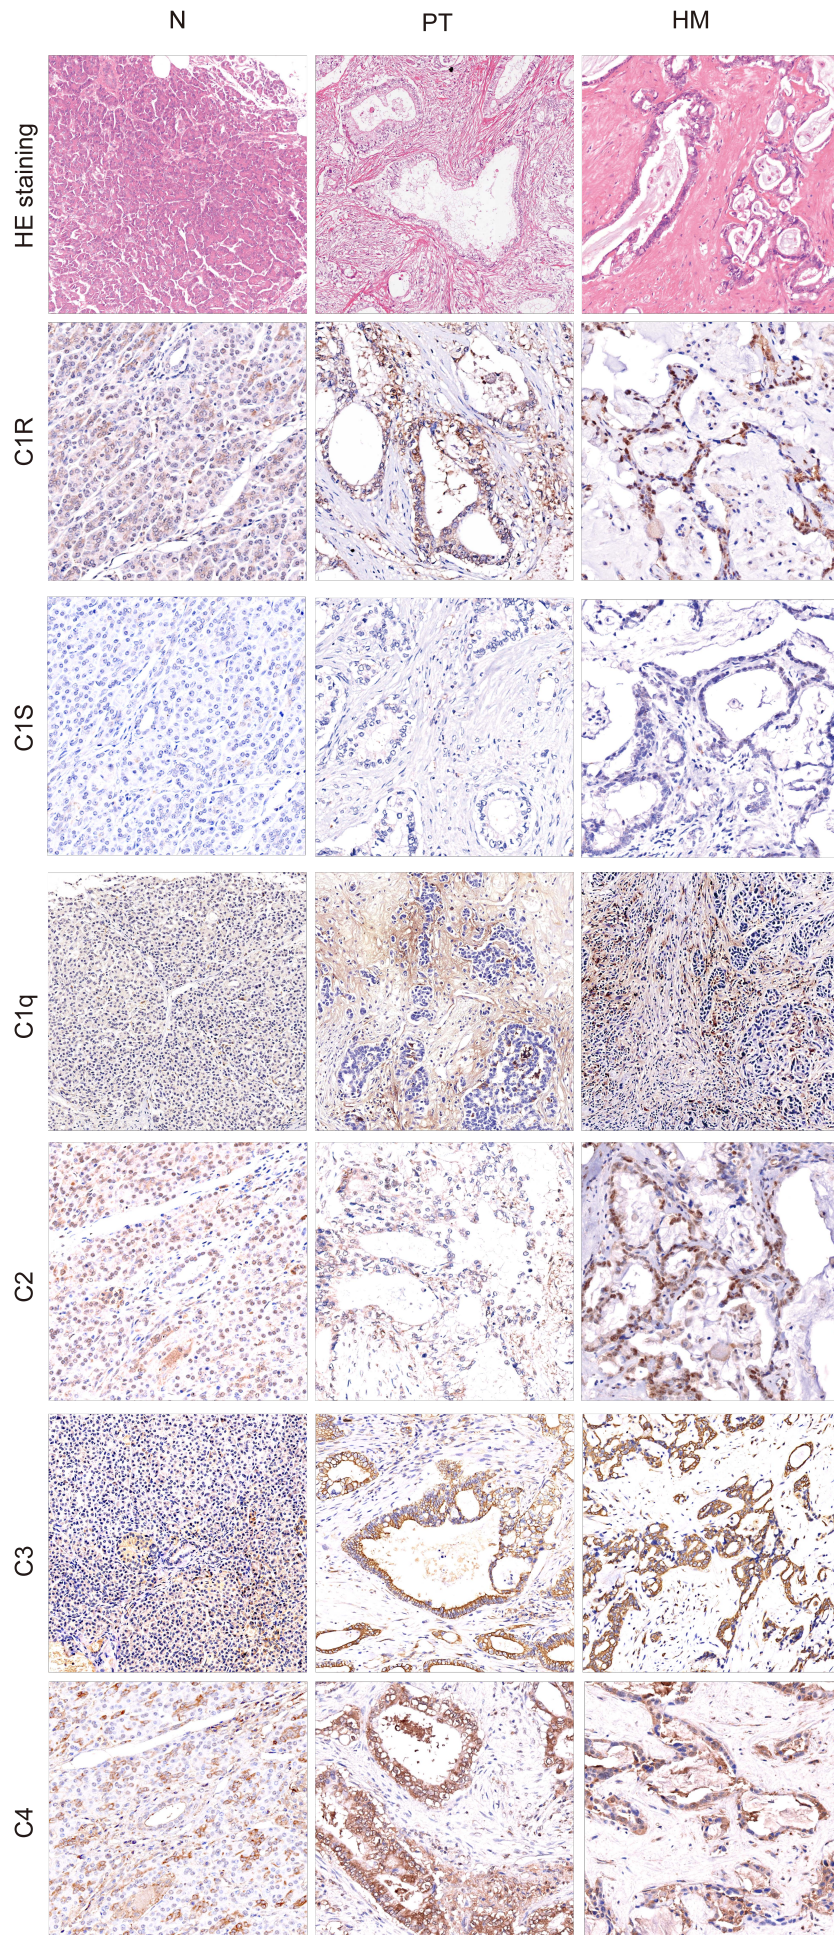

Fig S4

A

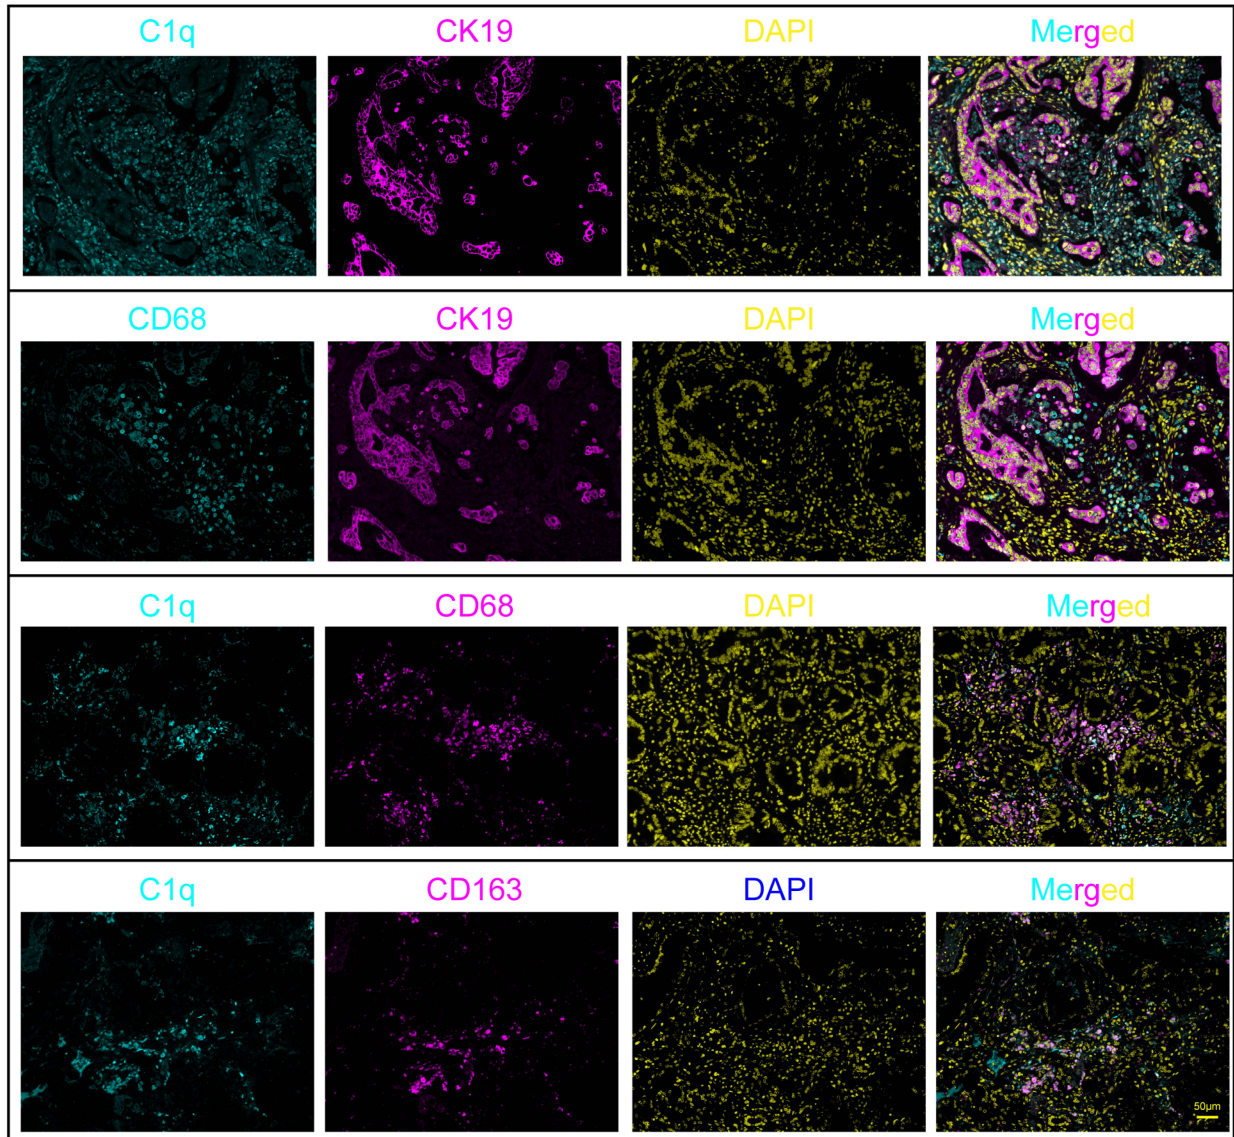

B

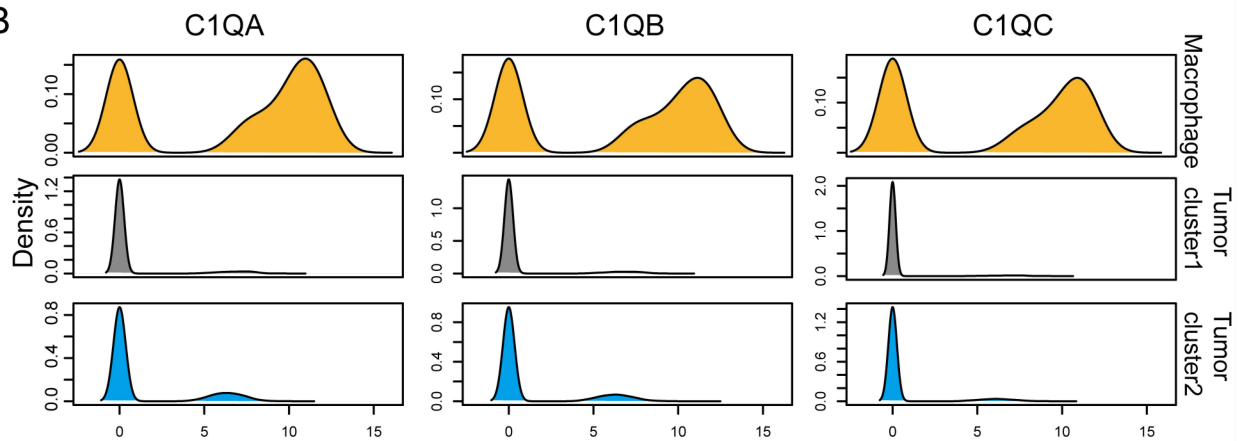

Fig S5

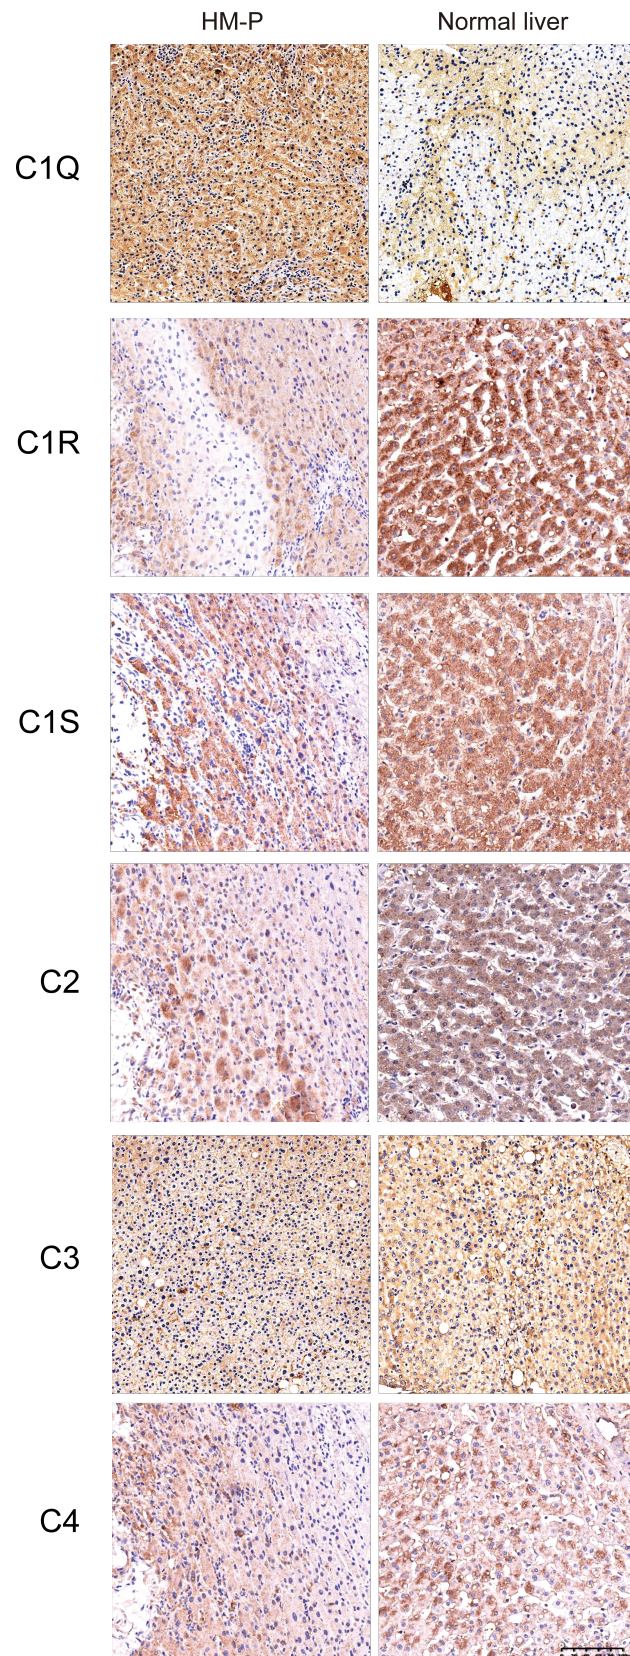



Fig S6

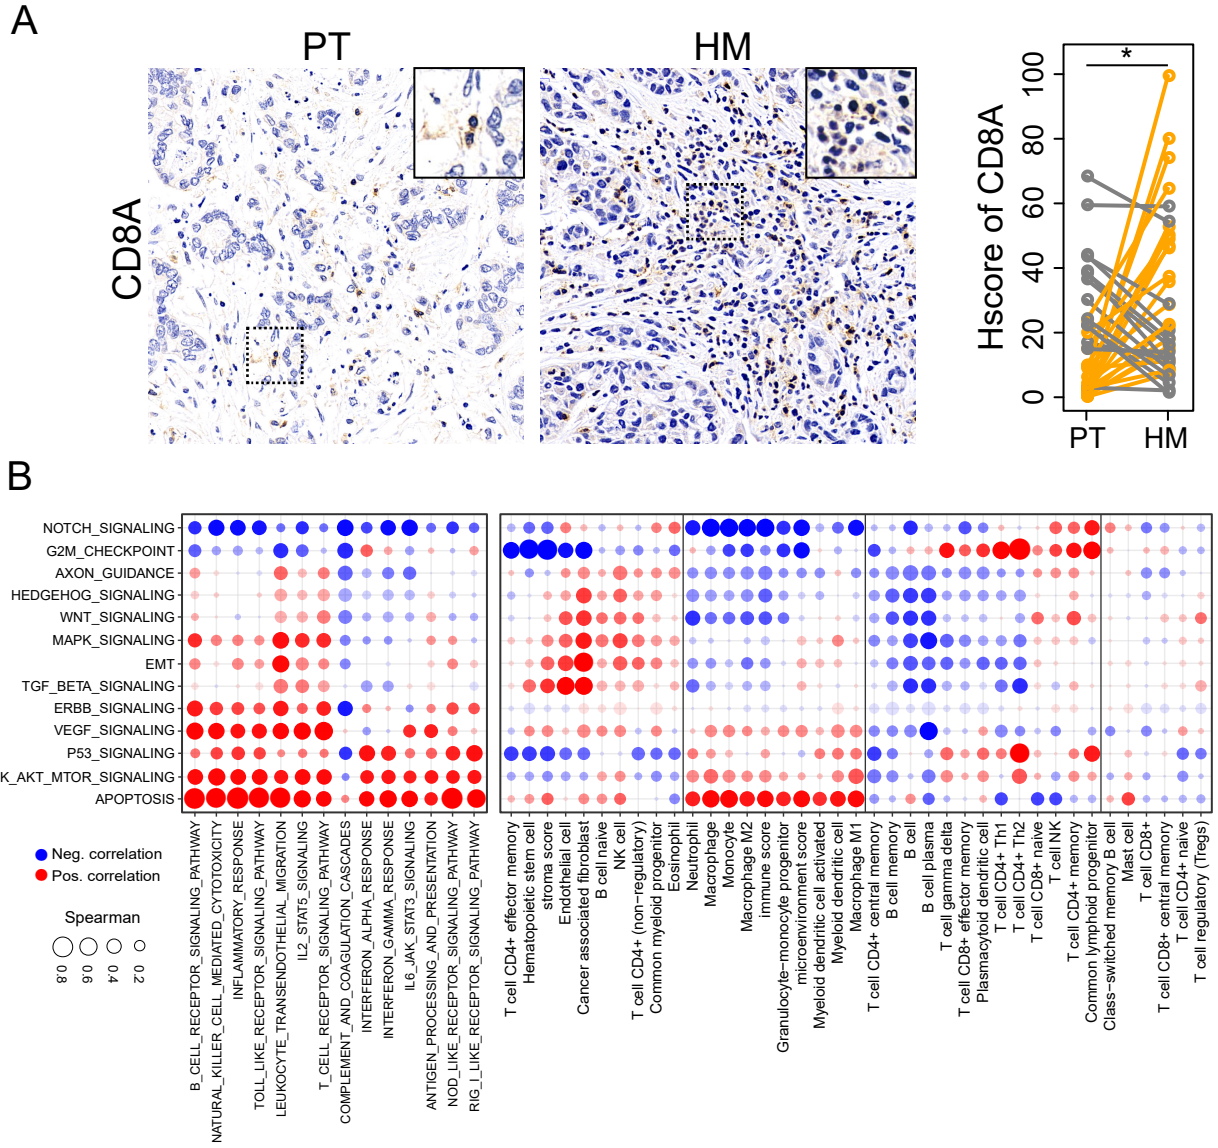

---

## Supplementary Table Notes

**Table S1. Clinical characteristics of 40 enrolled patients.** The specimens used for WES or RNA sequencing were also indicated in this table.

**Table S2. Somatic mutation list.**

**Table S3. Significantly occurred CNV regions identified by GISTIC2.** "N.S.": not significant.

---

## Supplementary Figure Legend

**Fig S1. Mutation profiles of paired PTs and HMs.** A) Tumor purity of all tumor samples assessed by WES; B) Tumor mutation burden of individual samples; C) Mutation profiles of highly altered genes across samples. Genes were grouped by their function. Among them, the detailed log<sub>2</sub>ratio values of PBRM1 and BAP1 of paired samples were indicated in D); E) Highlighted CNV events which exhibited significantly increased alteration prevalence in metastatic PDACs than that in non-metastatic PDACs. \*: 0.01<P<0.05; \*\*: 0.001<P<0.01; \*\*\*: P<0.001.

**Fig S2. Expression pattern A) and enriched pathways B) of common DEGs.**

**Fig S3. IHC staining of key components of classical complementary pathways in PT and HM specimens.** C1R, C1S, C2 and C4 were mainly stained in tumor cells. C3 was expressed mainly in tumor cells of PTs. But in HM, C3 was expressed both in tumor cells and tumor stroma. Only C1q expressed in tumor stroma of both PTs and HMs. HE staining results were showed in the top panel.

**Fig S4. IF staining of C1q, macrophage cell marker and epithelial cell marker in tumor specimens as well as single-cell RNAseq data analysis of the resources of C1Q.** A) IF staining of C1q and CK19 showed that C1q was mainly expressed in tumor stroma (top panel). IF staining results of CD68 and CK19 of the same patient as in the top panel were showed in second panel. Tissue slices of top two panel are sequential slices from same patient. IF staining of C1q and CD68 showed in third panel revealed that C1q in tumor stroma was mainly derived from macrophage. IF staining of C1q and CD163 showed in last panel revealed that M2 macrophage was the main contributor of C1q. B) Peng. et al. identified macrophages and two clusters of tumor cells in primary tumor tissues of PDAC [1]. Most of tumor cells exhibited zero count in C1QA, C1QB, and C1QC while large proportion of macrophages expressed C1QA, C1QB, or C1QC (UMI>=5).

**Fig S5. IHC staining of key components of classical complementary pathways in HM adjacent liver tissue and normal liver tissue.** Compared to normal liver, HM adjacent normal tissue (HM-P) showed increased protein level of C1Q. To be noted, this pattern was only displayed in C1Q while C1R, C1S, C2, C3, and C4 didn't display the same pattern.

**Fig S6. Correlation of oncogenic pathways and tumor immunity.** A) HMs had increased abundance of CD8+ T cell compared to corresponding PTs. \*: p<0.05. B) Spearman correlation between oncogenic pathways and immune-related pathways (left panel). And Spearman correlation between pathway NES values and xCell estimations of tumor infiltrating immune cells.

---

## Reference

1. Peng J, Sun BF, Chen CY, Zhou JY, Chen YS, Chen H, Liu L, Huang D, Jiang J, Cui GS, et al: **Single-cell RNA-seq highlights intra-tumoral heterogeneity and malignant progression in pancreatic ductal adenocarcinoma.** *Cell Res* 2019, **29**:725-738.
